# Supplementary material for: Sensory experience during locomotion promotes recovery of function in adult visual cortex
Source: eLife. 2014 Jun 26;3:e02798. doi: 10.7554/eLife.02798 (PMC4070284; doi:10.7554/eLife.02798)
Supplement: Figure 4—figure supplement 2—source data 1. — DOI: http://dx.doi.org/10.7554/eLife.02798.013 [file elife02798s001.csv]

8.22820	0.7603
2.64280	0.2413
2.06010	0.4009
1.86260	0.2459
0.41580	0.1511
1.66670	0.2092
1.50530	0.0884
0.34590	0.0245
0.28040	0.0558
1.55280	0.3424
0.13130	0.0275
1.27420	0.0069
0.27760	0.1396
0.52630	0.2380
0.00000	0.0000
0.12930	0.0167
0.27200	0.0381
0.14330	0.0128
2.31340	0.0364
1.96280	0.1567
1.54150	0.3787
0.42852	0.0166
0.33333	0.0360
0.29789	0.0486
3.44970	0.0939
0.16950	0.1064
0.51126	0.0403
0.27228	0.1091
0.11782	0.0296
0.24308	0.0233
2.46360	0.2864
0.18793	0.0802
19.31600	0.0253
0.41929	0.0594
2.17090	0.3665
0.76407	0.0968
1.64840	0.0073
1.62020	0.1440
0.23512	0.0153
0.00560	0.0714
0.17860	0.9863
6.55250	1.1838
0.47060	1.6558
0.00000	0.0076
1.66540	0.0228
1.80980	0.4909
2.38500	0.5933
1.99440	1.2308
0.95990	0.0320
0.35170	0.4593
1.48040	0.1224
0.20390	0.4860
1.45600	0.9539
0.80270	0.1371
0.55560	0.3305
0.76320	0.1191
0.33330	0.0537
0.33240	0.4838
0.22220	0.0261
4.22220	0.3245
3.74120	0.0299
6.34250	0.2563
5.22220	0.3626
0.34990	0.0805
1.05820	1.4116
5.26710	0.2530
8.34980	0.1014
2.09130	0.0195
0.61390	0.1636
3.20000	0.0734
8.42630	1.6163
0.87090	0.0339
6.25760	0.0220
2.29430	0.1047
1.68440	0.5582
0.46760	0.0626
1.84240	0.1968
2.15660	0.2092
2.49010	0.0512
15.95300	0.0602
4.90160	0.0861
7.75380	1.0853
1.09700	0.0300
9.64960	1.1009
0.54560	0.0504
1.09070	0.5860
0.07170	0.0051
1.46860	0.0889
0.86470	0.4297
0.21420	0.0288
2.29490	0.1847
14.75500	4.5118
5.50990	0.9878
3.67470	0.7976
0.50740	0.0709
3.41940	0.0557
11.07500	0.9724
0.27100	0.0150
0.23450	0.0000
5.98870	0.2381
2.70200	0.2731
0.40650	0.0696
6.50090	0.5007
0.42180	0.1498
2.34300	0.0235
0.63550	0.1175
0.11760	0.0188
0.67810	0.9880
0.73580	0.0424
0.60740	0.0698
1.65360	0.0192
0.56930	0.1063
0.65170	0.0408
1.63040	0.2020
0.97240	0.1502
1.32510	0.0554
1.59670	0.0585
0.68070	0.0722
1.86810	0.0659
8.42150	0.5050
7.35900	0.5470
0.42410	0.0189
1.47310	0.1132
0.12150	0.0000
1.15170	0.0028
0.74770	0.0323
0.56800	0.0237
0.75090	0.0263
4.24940	0.0150
0.12150	0.0000
1.82700	0.0508
0.41050	0.0167
0.18030	0.0087
0.43270	0.0199
0.07510	0.0000
1.28620	0.0843
8.49880	0.0608
1.11710	0.0410
0.11720	0.0000
1.26540	0.0597
3.28920	0.4169
0.23460	0.0041
0.59280	0.0042
6.10600	0.1530
0.37720	0.0021
5.09900	0.4566
0.23550	0.0041
5.38550	1.0656
0.77120	0.1156
4.13620	0.2779
0.80700	0.0959
1.40330	0.2968
0.00000	0.0000
0.82410	0.1368
4.07890	0.0628
0.12420	0.0152
0.00000	0.0000
0.23260	0.0435
1.76100	0.0940
0.00000	0.0000
0.43640	0.0800
2.85750	0.9066
0.11110	0.0112
2.07730	0.6922
0.11770	0.0047
4.41490	3.1108
0.79470	0.0304
2.50420	2.0365
2.03960	0.7231
2.95480	0.4443
0.97200	0.1306
0.33330	0.6583
0.52360	0.0913
0.54170	0.1568
0.45460	0.1368
0.33330	0.0756
0.30020	0.0464
0.90830	0.0986
0.53610	0.1916
0.23550	0.0116
3.74970	1.2341
10.32200	0.0264
0.00000	0.1771
0.81590	0.1600
5.17880	0.9087
0.56310	0.1684
0.12150	0.0051
2.52380	0.3820
0.12230	0.0000
2.53360	0.0989
2.44440	1.5863
6.34400	1.4861
2.52200	0.2494
2.99870	0.5638
1.00000	0.3956
0.00000	0.0689
0.14130	0.2698
0.39650	3.4817
1.58950	0.2840
0.11450	0.2058
0.57350	0.1227
3.70940	0.0183
1.14840	1.5459
1.12830	3.4490
4.06510	2.3905
0.00000	0.0000
2.11110	0.8722
0.44210	0.0223
1.12250	0.0221
1.89950	0.1694
6.38200	0.0769
3.02900	1.7332
4.19770	1.8893
13.45900	2.8740
14.87500	4.9651
6.09360	1.7771
0.20340	0.0413
0.67890	0.2384
1.92580	0.7095
4.03640	2.8812
8.43590	0.8105
2.61230	0.0279
2.24900	0.6088
2.56410	1.0280
7.44070	2.2127
8.41100	3.3987
7.50440	1.4782
0.41550	0.2960
5.63620	0.7343
0.68150	0.0623
0.31930	0.0580
0.62550	0.1166
4.25200	0.4245
0.27000	0.0889
1.63660	0.0045
0.20230	0.0262
4.93120	2.2617
0.12230	0.0057
2.35010	0.5917
0.11760	0.0100
1.67860	0.0313
3.29090	0.4649
4.43020	0.7784
3.36610	0.5102
1.57850	0.4095
1.30120	0.6237
0.49040	0.0315
1.65650	0.0672
1.14770	0.0339
5.49900	1.2472
3.17800	0.0979
0.28120	0.2589
0.14260	0.0065
0.83970	0.1160
1.77860	0.0877
5.44650	0.4079
10.71000	1.9266
2.00670	1.0121
4.21530	0.7836
0.23450	0.0110
3.98420	1.9748
0.93800	0.2395
0.55560	0.4165
0.25340	0.1437
1.05540	0.3866
0.11760	0.0000
1.88890	0.9144
0.11780	0.0167
0.11110	0.0885
0.35660	0.4113
0.32290	0.0789
0.62150	0.1943
0.41880	0.0751
0.22220	0.0532
0.13110	0.0401
0.12150	0.0056
0.19780	0.0212
0.17900	0.0000
0.97780	0.1383
3.31110	0.3069
4.04440	0.4524
0.11720	0.0107
0.44440	0.0350
0.66670	0.0804
0.51040	0.0609
13.44400	3.9629
0.22220	0.0176
0.05230	0.0049
0.22550	0.0117
5.72880	2.1645
17.44400	4.8618
5.19290	4.2439
15.66700	5.3880
0.00000	0.0000
7.43030	0.9424
0.14330	0.0124
1.10010	0.9400
0.99440	0.0699
2.67770	0.0445
4.82770	1.3941
1.66670	0.0856
1.36610	0.2974
0.83840	0.1261
1.06550	1.0224
0.00000	0.0165
6.48500	3.0999
0.14850	0.1435
2.53960	0.2874
0.48460	0.1477
0.19840	0.0863
1.39110	0.2072
1.73250	0.6166
1.66670	0.6254
0.11780	0.0141
2.26320	0.1004
2.33990	0.3466
8.63060	4.7321
1.58880	0.2640
3.77780	1.1447
3.77390	3.9406
1.22220	1.1346
10.11100	2.9550
0.11760	0.0119
7.88890	4.6106
3.00000	1.3254
8.66670	5.2442
0.35620	0.0822
1.70510	0.2840
1.44440	0.6237
1.57100	0.6398
0.05960	0.0155
8.98810	4.8472
1.35300	0.3644
1.34690	0.2836
0.11770	0.0105
10.11100	2.9009
1.22220	0.9481
3.64090	3.9771
3.22220	1.0734
6.88890	2.5109
5.00000	0.4530
1.83630	0.1073
4.00000	1.9061
7.33330	4.3885
0.34550	0.2098
0.00000	0.0410
1.19410	0.2523
0.66670	0.2943
0.51970	2.2996
0.11730	0.0255
0.00000	0.0176
0.11110	0.0076
1.79400	0.5972
0.12460	0.1684
0.44070	0.3547
0.87450	0.0586
0.24540	0.0724
0.33330	0.0000
1.30660	3.2906
0.37020	0.5058
0.11720	0.0129
0.44440	0.7228
0.18670	0.0430
0.36370	0.2860
0.11770	0.0190
0.46340	2.8131
2.42010	0.1601
0.91210	0.3409
0.37020	0.0000
0.11720	0.0772
1.40450	0.0066
0.44440	0.0208
0.18670	0.0335
0.36370	0.7053
0.11770	0.1693
0.46340	0.0154
2.42010	0.0587
0.91210	0.1086
1.13500	0.6147
0.48930	0.0293
0.99060	0.0358
0.33330	0.1032
0.33330	0.0748
0.17830	0.0128
0.23880	0.3275
5.92100	5.8359
1.53310	0.0128
0.83170	0.3324
0.35460	0.2020
0.45540	0.0583
0.67940	0.1120
9.64520	4.0042
11.44600	2.4234
0.80590	0.3224
1.89670	0.8324
0.13040	0.0117
3.57820	0.7578
0.23260	0.0060
3.89140	0.2888
0.21510	0.0146
1.53660	0.0466
0.40860	0.0546
1.25440	0.0823
0.27080	0.0143
0.13420	0.0013
0.53190	0.2616
1.29580	0.1913
4.56350	0.7742
2.19480	0.3092
0.65680	0.0837
1.40510	0.8529
2.38780	0.6503
8.21090	4.4511
0.98750	0.0895
8.13160	1.8954
2.56280	0.4618
0.75320	0.1029
0.11780	0.0229
1.77780	0.1764
0.12230	0.0140
1.65640	0.1339
0.49340	0.0528
0.16350	0.0923
2.19570	0.3313
2.56060	1.6986
0.42650	0.1126
1.99910	0.8636
0.10940	0.0149
0.52510	0.3359
1.29860	0.5722
4.15790	1.5680
0.61590	0.1198
1.90710	0.5834
0.11420	0.0222
1.03930	0.0213
1.58180	0.1569
1.05590	0.2978
0.46550	0.0335
0.39570	0.3072
0.55560	0.1520
5.03450	0.7427
0.23070	0.0127
1.06550	0.4085
0.11760	0.0066
0.48420	0.3250
4.11110	0.2067
2.00610	0.1615
0.23550	0.0253
0.39570	0.3045
1.25640	0.1555
0.22320	0.0305
0.39790	0.0506
0.38100	0.1293
0.36380	0.1679
1.99870	0.1667
0.84280	0.3553
4.22220	0.2366
0.00000	0.0066
0.11780	0.0199
0.00000	0.0000
0.56420	0.0130
4.67790	1.6854
0.84840	0.1541
2.75710	1.6368
0.00000	0.0000
0.12760	0.1017
0.09130	0.0629
6.90190	3.9932
1.15660	0.5974
1.83730	0.7647
0.28330	0.1574
0.43920	0.0880
0.21890	0.0575
1.34360	0.4940
6.73100	3.7641
0.11720	0.0000
0.40190	0.2004
0.93270	0.1556
1.33920	0.0787
1.84800	1.3393
3.93380	0.4778
0.11750	0.0053
0.30480	0.0095
3.46520	0.4232
1.25170	0.0717
3.95190	0.5537
0.45200	0.1022
0.24330	0.0261
1.62440	0.7429
4.61500	0.3522
0.97340	0.0231
0.27230	0.0268
0.00000	0.0217
4.55920	1.5625
0.53930	0.2858
0.00000	0.0433
0.79540	0.0639
1.74690	0.1747
0.08330	0.2505
0.00000	0.0000
0.66750	0.0561
0.41720	0.0671
1.33860	0.1644
0.87010	0.6911
0.00000	0.0000
0.29280	0.0110
0.11770	0.0127
0.93300	0.1508
0.70210	0.0894
0.34590	0.0188
0.11810	0.0947
0.46640	0.2621
1.44710	0.3051
1.20700	1.5004
0.23510	0.0501
0.93830	0.2329
0.09930	0.0999
1.54990	0.3107
0.90210	0.6405
0.73590	0.6104
3.20650	0.8963
0.78530	0.3139
0.68650	0.0134
0.11110	0.0068
0.60600	0.0433
2.28400	1.8423
1.36110	0.2375
1.53800	0.0813
0.08830	0.0224
1.33290	0.1821
3.95150	0.8401
1.38240	0.7069
2.03620	0.3568
0.36100	0.0577
2.55560	0.1198
0.80950	0.0529
1.11110	0.2473
0.08940	0.0369
0.75870	0.0451
0.13790	0.0271
1.23210	0.0000
0.30660	0.0307
0.00000	0.0066
0.95220	0.9057
1.88890	0.8260
4.66670	0.0944
0.14110	0.0092
1.22220	0.0823
0.00000	0.0022
2.74600	0.2192
1.31160	0.9674
0.00000	0.0132
1.99240	0.5531
0.12420	0.0208
1.15470	0.0772
0.78260	0.1027
2.27580	0.0967
0.10300	0.0377
1.04410	0.0330
0.12170	0.0144
0.00000	0.0066
1.44690	0.6427
0.47720	0.1353
0.11780	0.0203
2.17980	0.7601
0.27940	0.2723
4.73600	1.2767
2.40830	0.8860
0.30040	0.0284
1.34340	0.3877
0.05420	0.0291
0.12420	0.0152
0.74550	0.3176
0.30060	0.0877
0.56820	0.1863
1.57710	0.7765
0.25750	0.0107
0.22220	0.0363
0.20760	0.0433
0.12420	0.0089
0.23390	0.0738
0.41110	0.0813
0.80720	0.2755
0.14530	0.0280
0.14430	0.0113
0.22550	0.0238
0.22220	0.0185
0.24470	0.0353
0.53340	0.0418
2.28830	3.9022
0.22220	0.1619
0.30910	0.0115
0.72420	0.0657
0.50000	0.0754
4.39540	0.6251
0.65050	0.2146
0.81230	0.6803
0.11720	0.0065
0.22220	0.2186
1.15440	0.3974
0.40990	0.2487
0.65960	0.3375
4.44790	2.1906
0.24900	0.1418
0.60080	0.0836
7.52400	0.5280
0.00000	0.0066
0.75800	0.0498
0.19820	0.0292
2.28830	3.8773
0.00000	0.0211
0.72420	0.0770
0.56320	0.0870
4.74000	0.6096
0.49180	0.2123
1.11790	0.0065
0.14030	0.0065
0.12230	0.0263
0.51570	0.0891
6.64960	0.5001
0.32230	0.1992
4.20530	2.0302
0.31760	0.1571
0.22220	0.2193
0.23560	0.1142
0.42680	0.4855
3.31540	0.6152
0.19160	0.2599
0.63800	0.1940
0.22220	0.8850
0.00000	0.0206
3.42000	1.9746
9.21120	0.2870
0.47440	0.7180
0.33760	0.2977
0.94030	0.0517
0.37220	0.4730
2.48850	4.4766
1.59650	1.0067
3.42530	0.6308
0.00000	0.0150
0.42680	0.0235
0.58790	0.2115
3.20200	0.1935
0.63800	0.1064
0.32830	0.0317
0.22220	0.0661
9.70500	0.8195
0.41860	0.1419
0.51520	0.0742
1.36010	0.2268
3.61690	0.5094
3.45960	0.2992
2.41890	1.4892
0.94680	0.3697
3.71720	0.1770
0.07380	0.0042
0.32940	0.0731
0.55110	0.0792
0.93090	0.0533
0.00000	0.0135
6.00110	0.3927
0.12230	0.0000
1.52920	0.0220
3.37860	0.9315
0.86350	0.0152
4.22910	0.1828
0.83430	0.3770
0.25540	0.0151
0.55110	0.0756
0.22580	0.0486
0.20800	0.0158
1.46160	0.0598
5.97640	0.4041
3.05330	0.9218
0.40840	0.2735
1.03530	0.0114
0.50360	0.5606
0.00000	0.0066
3.78210	2.4189
0.41290	0.0200
1.27640	0.3223
0.35350	0.0196
0.88890	0.6368
0.11760	0.0336
5.55730	2.8426
0.00000	0.7190
0.83960	0.1909
1.17900	0.0165
0.71330	0.5627
0.35350	0.0196
0.66670	0.6509
0.39160	0.0486
1.26410	0.9075
5.83180	2.9230
1.04970	0.5267
0.33330	0.6199
0.52810	0.0361
0.33910	0.1003
0.63490	0.0068
0.00000	0.0186
2.88890	3.0332
0.64920	0.4052
5.11110	0.1670
1.33330	0.0558
1.33330	0.6171
0.21850	0.0564
2.16910	0.0873
2.06010	0.5003
0.05870	0.0129
0.07230	0.0000
1.79490	0.0713
0.24310	0.0000
0.38000	0.0863
0.20120	0.0258
0.77700	0.0102
0.00000	0.0255
0.77780	0.0795
1.22220	0.6023
2.00990	0.3024
0.34990	0.0592
0.37290	0.1156
0.12740	0.0105
0.18960	0.0529
4.33330	1.2281
2.22610	2.0461
0.11800	0.0346
0.38210	0.0251
1.23600	0.1175
4.93570	0.6223
1.15920	0.7185
0.91260	0.4616
0.11760	0.0106
0.34380	0.1953
0.48540	0.0958
2.79820	1.2749
1.01480	1.9988
4.44440	1.2657
0.07010	0.0177
0.73910	0.0915
0.00000	0.0030
2.58140	0.3607
0.41220	0.0511
1.14170	0.7116
2.08910	0.5636
4.66870	0.3792
0.98610	0.4602
2.22800	0.5255
1.19170	0.4552
0.94160	0.5935
2.02040	0.7276
0.75600	0.5306
0.13640	0.0316
0.12110	0.0049
0.12230	0.0044
0.76010	0.0898
0.70680	0.1819
0.11020	0.0332
1.41930	0.1564
0.12150	0.0043
1.68380	0.5524
0.25020	0.1531
1.60920	0.6014
1.22420	1.2575
0.95270	0.0705
2.11350	0.7525
0.65880	0.5389
0.74390	0.0620
1.77750	0.5668
1.69270	0.0202
1.69050	0.6175
1.34530	1.2237
0.00000	0.1396
0.00000	0.0060
3.21530	0.3781
0.43730	0.0539
0.24420	0.0060
1.49880	0.0056
2.28650	0.8622
1.08340	0.1438
0.12040	0.1301
1.13230	0.1312
1.11110	0.0403
0.07740	0.0000
0.62650	0.4761
0.48390	0.1018
1.81480	1.5624
0.79330	0.7479
0.87100	0.2532
0.18270	0.0000
0.66670	0.0336
3.33470	0.4095
0.66670	0.0158
0.33420	0.0537
0.11110	0.0000
0.27800	0.0110
0.14350	0.0000
1.85780	0.1625
1.42640	0.1674
5.33330	2.4111
2.25000	0.8591
0.15530	0.0056
1.81440	1.5084
0.62570	0.4674
0.55560	0.0470
0.19910	0.1240
1.71840	0.0000
1.96060	0.3320
0.12230	0.0240
1.70690	0.6806
0.29180	0.1119
0.21670	0.0497
0.36630	0.0643
1.59020	0.5109
2.20680	0.8130
1.09220	0.4964
0.24660	0.0297
1.78390	0.0000
1.90480	0.3170
0.61690	0.1000
0.38520	0.0572
0.56110	0.1358
1.36320	0.7914
1.09330	0.5016
2.26920	0.8003
4.55130	8.6099
1.83590	0.9555
16.74800	7.3040
1.63530	1.3937
1.69640	0.2170
2.36640	0.4200
0.00000	0.0000
1.67190	0.0868
1.02360	0.4182
0.78870	0.2576
0.98250	0.2708
0.84940	0.3274
0.56670	0.2389
0.31260	0.0196
3.65420	0.6073
2.09080	0.3521
3.53380	0.0334
2.36530	0.3333
0.12150	0.0066
4.74790	8.4759
1.66750	1.3590
2.17490	1.0848
16.64000	7.0980
1.12430	0.9773
6.22460	2.4085
1.69640	0.2200
2.34950	0.4737
0.64950	0.4499
0.62190	0.3351
0.57100	0.2391
1.67190	0.0922
2.58550	0.3418
3.55730	0.6231
0.40480	0.0138
2.82660	0.3104
3.19250	0.0364
5.43480	1.0467
1.22780	0.3630
8.85720	6.5343
2.91800	1.0921
1.05620	0.0852
0.00000	0.0242
0.11780	0.0077
2.56450	1.1026
0.26580	0.1498
3.10030	0.7523
0.20570	0.1222
2.11110	0.7462
2.75790	1.0237
0.46200	0.1736
4.19480	0.8644
5.92410	1.2038
1.94760	0.6707
9.81790	6.3930
5.29550	3.4310
2.14300	0.2316
0.11760	0.0101
2.04700	0.3318
0.84210	0.3582
3.25270	0.6801
3.42380	0.7553
2.43200	1.0806
2.53560	0.9560
1.71380	0.1157
5.95000	3.5991
1.87080	0.4185
0.62010	0.1342
0.81910	0.1447
0.14080	0.0196
2.38310	0.4599
7.64060	3.9897
3.99700	2.9698
3.34090	2.5874
1.20630	0.3784
0.00000	0.0000
0.77780	0.6110
0.74500	0.0604
4.60100	2.0175
1.68510	0.4280
1.99690	0.2638
0.07230	0.0000
2.19070	0.4043
1.12360	0.2966
7.93750	4.4036
3.79200	2.7944
3.35990	2.6189
0.85260	0.3832
0.99210	1.4112
0.10770	0.0067
0.88890	0.6046
0.70110	0.0434
