# Supplementary material for: Sensory experience during locomotion promotes recovery of function in adult visual cortex
Source: eLife. 2014 Jun 26;3:e02798. doi: 10.7554/eLife.02798 (PMC4070284; doi:10.7554/eLife.02798)
Supplement: Figure 4—figure supplement 2—source data 3. — DOI: http://dx.doi.org/10.7554/eLife.02798.015 [file elife02798s003.csv]

4.711	0.751
7.428	0.379
6.018	0.348
1.360	1.085
3.847	2.993
1.586	0.882
0.369	0.318
3.039	1.171
29.160	1.201
5.997	0.575
2.652	1.454
3.455	3.318
0.179	1.656
3.602	1.659
0.624	0.170
0.122	0.007
15.465	1.730
3.473	0.117
7.455	0.614
3.629	0.203
2.516	0.088
3.111	0.659
4.500	1.808
4.516	2.475
13.221	3.410
2.391	0.402
5.519	0.036
5.635	0.950
2.799	1.263
6.953	0.537
0.150	0.019
5.079	0.892
0.444	0.125
0.138	0.007
5.005	1.961
1.363	0.759
5.241	1.413
3.111	1.852
2.244	0.475
6.867	1.295
10.924	0.399
2.444	2.336
17.678	5.281
0.110	0.016
1.246	2.280
0.962	0.675
13.323	4.533
3.855	4.456
14.244	13.097
8.258	4.136
14.885	8.062
2.186	1.422
3.497	0.480
0.888	0.211
1.904	0.686
3.448	0.083
16.085	0.447
3.645	1.220
15.284	0.565
0.000	0.004
10.168	0.573
3.582	0.722
0.117	0.011
2.222	0.837
3.041	1.143
0.102	0.015
0.687	0.830
4.432	0.184
0.915	0.208
1.633	0.471
0.791	0.088
2.127	0.107
7.990	0.169
0.092	0.041
2.566	0.059
7.239	0.159
0.249	0.024
0.234	0.010
2.448	0.298
0.871	0.120
0.687	0.834
4.713	0.160
0.885	0.217
0.401	0.089
0.791	0.095
2.219	0.110
7.743	0.174
7.343	0.183
2.566	0.059
1.931	0.044
0.119	0.023
0.122	0.067
0.000	0.280
0.644	0.383
1.323	0.301
0.950	0.389
2.839	1.105
8.857	0.708
0.229	0.105
5.529	2.796
0.920	0.068
4.561	0.591
6.052	1.296
20.006	4.439
0.117	0.089
5.542	3.221
0.151	0.007
3.257	0.061
4.010	0.338
7.044	2.184
6.544	1.570
2.804	0.558
0.635	0.173
0.117	0.017
1.876	0.084
2.501	0.610
0.122	0.007
0.620	0.124
3.382	0.949
28.615	1.314
1.444	0.281
0.122	0.007
2.018	1.200
0.000	0.021
0.778	1.362
28.376	19.547
1.288	0.770
1.797	0.185
1.587	0.045
1.724	1.046
0.293	0.030
2.333	3.136
5.244	2.024
3.929	0.333
6.866	3.681
0.675	0.378
0.122	0.044
0.631	0.136
0.211	0.219
2.584	3.194
3.172	2.922
0.333	1.034
1.370	1.020
0.668	0.395
1.587	0.045
1.724	1.046
0.366	0.053
0.864	0.424
6.947	3.816
0.463	0.157
4.067	0.342
3.861	3.138
3.618	3.178
1.402	1.320
0.525	0.287
0.704	1.051
0.127	0.000
0.873	0.126
0.628	0.110
1.627	0.580
0.460	0.065
1.967	0.054
0.211	0.017
0.842	0.027
2.781	0.371
1.128	0.124
0.122	0.007
6.295	2.472
1.639	0.586
2.180	0.948
6.403	1.049
0.491	0.171
1.292	0.465
0.143	0.016
0.365	0.136
0.553	0.155
0.436	0.086
0.307	0.115
0.111	0.033
1.763	0.792
6.510	1.077
1.303	0.507
0.109	0.007
0.686	0.065
0.118	0.008
6.164	3.491
1.780	0.422
2.571	2.030
0.603	0.177
0.629	0.143
3.110	1.174
0.000	0.006
1.202	0.542
0.811	0.375
6.795	3.340
1.776	0.418
1.230	0.210
3.618	1.583
3.089	1.089
0.581	0.171
0.359	0.271
1.826	0.596
2.540	1.558
5.271	3.410
1.687	0.633
2.618	1.132
0.117	0.000
9.075	3.962
0.618	0.235
1.760	0.611
0.651	1.396
4.208	0.632
0.565	0.171
1.524	0.096
5.116	2.592
0.000	0.002
0.352	0.046
0.188	0.036
0.000	0.000
1.881	1.245
2.872	0.424
0.118	0.013
3.870	1.533
3.272	1.131
0.630	1.331
5.080	2.948
27.584	4.292
3.767	0.641
0.361	0.073
6.961	2.173
0.444	0.037
0.135	0.027
2.650	1.373
0.474	0.354
0.158	0.435
1.732	0.937
6.950	4.046
1.716	0.590
0.350	0.289
0.444	0.037
2.066	1.398
0.405	0.388
0.135	0.031
0.117	0.027
0.806	0.330
2.003	1.177
1.435	0.297
7.207	4.003
1.175	0.523
2.945	0.912
0.808	0.325
0.109	0.000
1.436	0.207
3.668	1.783
0.099	0.025
1.665	0.130
0.247	0.099
2.342	0.416
1.932	1.447
6.066	3.314
5.744	0.603
1.111	2.822
1.087	0.039
3.007	0.916
0.854	0.340
3.710	0.246
2.308	0.340
7.765	3.178
0.083	0.071
0.472	0.389
2.236	0.304
6.652	3.297
2.413	0.341
0.755	2.506
2.516	0.497
2.808	0.444
2.156	0.783
0.243	0.054
0.339	0.270
1.187	0.294
2.110	0.300
13.097	4.121
4.069	2.698
1.418	0.892
7.148	1.224
0.147	0.002
2.063	1.245
3.489	1.730
2.083	0.684
11.670	2.366
1.440	0.903
1.535	0.018
4.376	0.690
13.572	4.151
1.085	0.203
6.765	1.207
1.765	0.974
1.819	2.010
0.114	0.009
7.834	7.899
0.147	0.002
2.000	1.219
0.323	0.016
5.873	1.027
0.630	0.061
0.695	0.090
9.126	2.941
9.557	2.165
0.394	0.144
5.668	0.474
7.537	0.784
2.950	0.023
6.007	1.094
9.142	2.934
0.400	0.076
5.585	0.472
9.686	2.173
7.043	0.643
6.044	1.402
19.553	0.132
9.106	4.464
0.108	0.036
0.557	0.117
1.672	2.139
0.546	0.125
0.563	0.354
2.290	1.751
1.968	0.579
6.832	3.255
0.231	0.022
13.585	7.109
8.056	3.826
11.326	1.579
5.127	3.252
0.956	3.020
0.088	0.014
0.692	0.412
9.159	2.348
5.885	2.568
10.677	7.555
4.385	0.449
5.471	4.844
12.514	3.835
0.550	0.121
1.652	1.066
6.649	3.118
0.141	0.010
1.221	3.269
11.705	1.683
2.414	0.657
1.794	0.251
0.000	0.015
8.040	4.968
5.025	2.664
8.789	2.286
10.194	7.368
0.092	0.031
0.664	0.444
0.059	0.027
0.295	0.414
10.902	1.759
6.240	1.389
17.043	13.286
12.638	9.138
0.922	0.445
8.722	1.670
0.077	0.019
9.138	4.928
2.923	2.896
11.018	1.734
17.388	13.363
1.490	0.461
6.191	1.431
12.661	9.146
19.144	1.272
0.681	0.442
1.356	1.029
1.533	0.036
2.908	1.992
9.223	4.461
0.333	0.180
13.346	10.432
3.430	2.444
6.512	6.363
2.728	1.021
0.611	0.254
0.000	0.030
0.647	0.132
0.822	0.357
1.708	0.109
2.356	0.811
1.263	0.083
0.385	0.013
0.611	0.255
2.663	0.879
1.521	0.135
0.115	0.007
2.118	0.801
3.287	1.882
0.268	0.554
3.732	5.678
4.148	2.497
2.693	4.536
2.210	1.212
0.118	0.013
0.270	0.219
2.485	2.135
0.731	0.649
3.247	1.847
0.735	0.528
3.971	2.487
3.555	5.548
2.026	1.281
2.814	4.701
0.283	0.248
1.884	1.564
0.407	0.375
0.110	0.059
0.157	0.124
3.412	0.200
5.612	1.663
5.584	2.567
1.278	0.644
1.807	0.584
14.853	7.680
1.815	0.185
2.015	0.116
3.189	0.801
9.879	3.600
5.825	2.744
3.147	0.709
3.592	0.187
1.752	0.644
1.293	0.628
13.990	7.266
10.045	3.626
1.364	0.037
0.996	0.101
3.447	0.778
4.112	0.731
0.118	0.019
24.072	0.236
8.372	0.508
7.510	1.361
1.866	1.277
0.438	0.075
4.392	2.032
8.398	6.484
0.491	0.334
0.894	0.320
0.423	0.377
0.589	0.366
1.152	0.274
0.556	0.321
0.151	0.007
6.503	2.667
1.072	0.431
2.377	0.186
4.466	1.966
7.995	1.627
1.764	1.391
8.238	0.461
1.374	0.993
0.523	0.290
0.322	0.474
0.328	0.341
1.244	0.280
3.634	0.669
0.889	0.524
0.231	0.000
6.237	2.473
6.011	0.325
0.305	0.087
12.014	2.199
8.897	0.376
0.870	1.288
0.456	0.080
0.839	0.074
1.765	0.517
5.948	0.343
1.541	0.978
2.245	0.762
4.060	0.365
1.403	0.057
11.952	2.180
6.247	0.372
9.788	0.381
0.318	0.092
0.695	1.282
5.446	0.265
0.506	0.536
0.665	0.142
0.226	0.767
1.305	0.938
5.102	0.536
4.920	1.234
7.837	2.264
2.079	0.261
0.127	0.040
8.491	1.140
0.537	0.216
0.122	0.008
0.223	0.060
10.180	5.178
0.844	0.053
9.036	4.355
5.433	3.365
3.622	1.221
7.833	2.284
1.066	0.409
0.786	0.260
8.302	0.975
0.443	0.103
2.120	0.406
8.170	4.203
5.238	3.327
4.107	1.363
0.137	0.019
2.937	0.173
3.421	0.402
0.577	0.160
0.295	0.001
2.485	1.140
4.203	0.027
4.836	1.199
3.426	0.248
0.262	0.026
1.231	0.340
0.421	0.007
4.012	0.238
9.857	5.836
2.344	0.716
1.985	0.033
4.647	0.681
1.010	0.291
3.497	0.520
14.386	4.965
1.954	1.766
2.592	0.532
0.127	0.007
4.447	0.751
0.935	0.372
3.955	0.369
4.493	1.161
4.135	0.026
0.471	0.029
2.386	0.020
9.963	5.634
5.076	0.242
4.829	0.717
14.441	4.709
3.857	2.291
0.144	0.062
0.000	0.149
0.144	0.212
1.332	0.296
3.930	1.011
1.772	0.907
0.127	0.014
0.979	0.628
1.996	1.526
1.803	0.540
1.207	0.726
0.103	0.062
11.850	11.334
7.653	3.914
1.734	0.918
5.001	1.022
0.507	0.234
2.436	0.500
1.527	0.985
1.386	0.078
1.883	0.464
6.726	1.765
0.685	0.164
1.572	0.025
1.653	1.098
0.235	0.007
16.357	2.968
0.165	0.007
2.992	1.508
0.287	0.022
7.183	1.776
1.639	0.741
1.572	0.007
3.485	1.401
0.143	0.007
16.967	2.969
0.258	0.016
3.061	1.479
0.235	0.007
8.252	1.192
4.995	0.307
0.396	0.054
7.795	1.748
1.301	0.061
0.269	0.020
0.313	0.105
12.882	0.335
0.282	0.139
0.147	0.045
1.469	0.469
0.161	0.007
7.957	1.787
8.019	1.103
0.758	0.272
1.916	0.378
0.117	0.019
0.622	0.095
0.681	0.050
11.528	0.352
2.106	0.482
3.584	1.129
1.806	0.390
1.934	1.752
2.507	0.404
3.836	1.633
0.240	0.373
2.538	0.882
0.118	0.010
0.255	0.598
1.659	0.244
1.813	0.401
1.706	1.764
2.496	0.423
0.075	0.020
1.778	0.718
0.754	0.504
4.164	1.656
2.012	0.257
0.345	0.753
0.152	0.171
1.996	2.160
19.501	2.753
0.117	0.113
5.738	1.850
3.973	4.847
1.450	0.977
5.199	1.958
0.313	0.070
0.111	0.004
0.550	0.072
0.111	0.019
2.251	2.173
0.211	0.237
2.590	2.675
3.670	2.477
3.319	1.897
0.072	0.276
0.118	0.006
6.110	1.954
2.921	2.460
1.275	0.249
3.765	4.814
5.164	2.013
0.117	0.006
0.111	0.076
2.280	0.275
0.144	1.059
0.118	0.000
1.653	0.952
0.111	0.091
0.633	0.175
3.877	0.504
10.435	3.471
3.832	1.058
0.113	0.092
1.434	0.290
0.125	1.057
0.118	0.007
0.457	1.201
2.118	0.925
0.111	0.000
0.951	0.116
10.777	3.444
3.849	1.055
7.579	0.379
2.148	0.670
2.439	0.532
1.077	0.084
1.620	1.137
6.069	0.355
4.720	3.091
5.619	1.150
2.113	0.118
3.129	1.279
7.702	1.306
4.204	1.819
10.689	0.157
2.827	2.125
0.839	1.689
2.516	0.088
16.218	1.718
2.523	0.127
5.964	0.497
3.816	0.117
4.475	1.783
15.244	3.946
3.393	0.629
29.168	1.315
5.297	2.565
5.510	0.040
7.586	0.524
5.685	0.957
4.290	0.926
3.397	2.971
1.022	0.448
3.464	0.250
9.002	1.389
4.065	1.970
8.308	1.835
7.044	1.049
0.667	0.461
17.272	0.432
3.556	0.465
5.312	2.523
14.985	5.265
16.187	5.031
7.858	2.285
13.020	3.457
20.317	2.218
16.293	3.686
3.352	0.319
15.880	0.434
